# Supplementary material for: Evaluation of the Synergistic Effect of Erosion-Corrosion on AISI 4330 Steel in Saline-Sand Multiphase Flow by Electrochemical and Gravimetric Techniques
Source: Hindawi journal article supplement (doi:10.1155/2016/1831654), 2016-01-01
Supplement: f1 [file 1831654.f1.pdf]

## SUPPLEMENTARY CONTENT

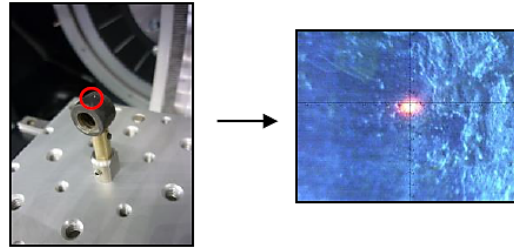

Fig. 1. 4330 steel electrode in the equipment of X-Ray Diffraction.

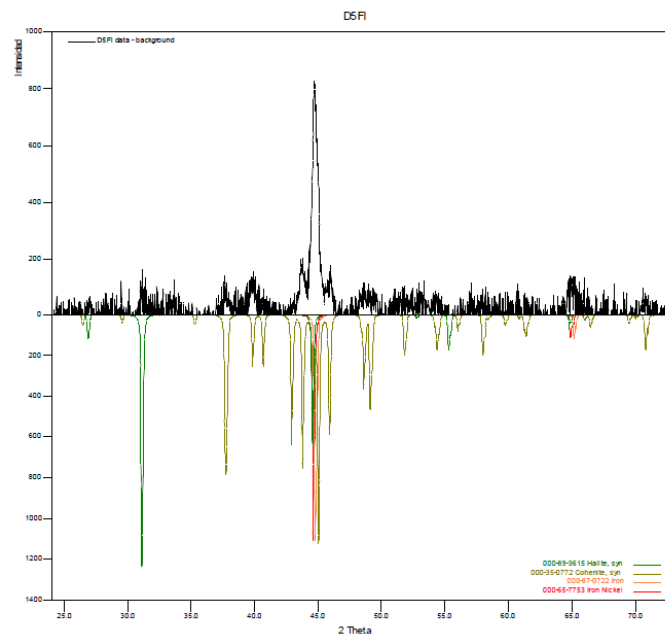

Fig. 2. XRD spectra of 4330 steel electrode surface after test in a solution containing 3 wt.% NaCl and 10 wt.% sand at 2800 rpm - pH 7 – 105  $\mu\text{m}$

**Table 1.** Crystalline phases determined by XRD applied to the 4330 steel electrode surface after test in a solution containing 3 wt.% NaCl and 10 wt.% sand at 2800 rpm - pH 7 – 105  $\mu\text{m}$

| Phase       |                         | Name      |
|-------------|-------------------------|-----------|
| Crystalline | $\text{SiO}_2$          | Quartz    |
|             | $\text{Fe}_3\text{O}_4$ | Magnetite |
|             | NaCl                    | Halite    |
|             | Fe                      | Iron      |

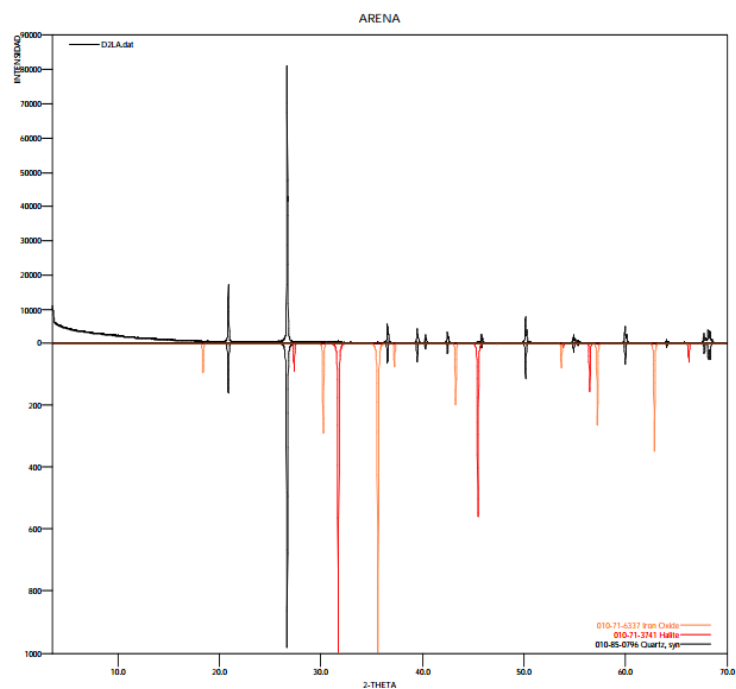

Fig. 3. XRD spectra of the sand particles after test in a solution containing 3 wt.% NaCl and 10 wt.% sand at 1800 rpm - pH 3- 53  $\mu\text{m}$

Table 2. Crystalline phases determined by XRD applied to the sand particles after test in a solution containing 3 wt.% NaCl and 10 wt.% sand at 1800 rpm - pH 3- 53  $\mu\text{m}$

| Phase       |                         | Name     |
|-------------|-------------------------|----------|
| Crystalline | $\text{SiO}_2$          | Quartz   |
|             | $\text{Fe}_2\text{O}_3$ | Hematite |
|             | NaCl                    | Halite   |
